# Supplementary material
Source: publisher figshare collection journal article supplement (https://karger.figshare.com/ndownloader/files/5519834)
Supplement: Supplementary file 1 [file 5519834]

Table 2

|  | Prior OAT  n = 2 214 | No prior OAT  n = 14 698 | *P* value |
| --- | --- | --- | --- |
| Mean age (years) ± SD | 77.1 ± 10.0 | 73.1 ± 13.4 | < .001 |
| Female sex | 1 082 (48.9 %) | 7 112 (48.4 %) | 0.68 |
| Known AF | 710 (32.1 %) | 2 931 (19.9 %) | < .001 |
| Known hypertension | 693 (31.3 %) | 4 736 (32.2 %) | 0.39 |
| Known diabetes | 633 (28.6 %) | 4 321 (29.4 %) | 0.45 |

Patient characteristics of acute ischemic stroke patients admitted 2012 – 2014 within 24 h of symptom onset with or without active OAT (VKA or NOAC) upon admission.
